## Disruption of thyroid endocrine in zebrafish exposed to BDE-209

Dong Li, Xin Wang\*

Department of Environmental Toxicity, Third Hospital of Shanxi University

### Abstract

Polybrominated diphenyl ethers (PBDEs) could adversely affect the thyroid endocrine system; previous studies report that BDE-209 has the potential effect on the fish thyroid endocrine system. In this study, we aimed to verify the bioconcentration and metabolism of BDE-209 in zebrafish. One day post-fertilization (dpf) zebrafish embryos were treated with different concentrations of BDE-209 (0, 0.01, 0.1 and 1 mg/L) until 10 dpf. BDE-209 was obviously accumulated in the zebrafish after 10 days exposure, and the metabolic products such as octa-BDE and nona-BDE were detected. After treated with BDE-209, the triiodothyronine (T3) and thyroxine (T4) levels were significantly decreased, suggesting that exposure to BDE-209 could disrupt the thyroid endocrine system in zebrafish. The transcriptional expression of genes involved in the hypothalamic-pituitary-thyroid (HPT) axis was altered. The mRNA expression levels of corticotrophin-releasing hormone (CRH) and thyroid-stimulating hormone (TSH $\beta$ ) were significantly increased. The mRNA expression of pax8 and nkx2.1 which regulate thyroid development and synthesis were also increased. These data indicated that BDE-209

could disrupt the thyroid endocrine system in zebrafish, which could be assessed by hypothalamic-pituitary-thyroid axis.

**Keywords:** BDE-209; HPT; Thyroid endocrine disruption; zebrafish

## **Background**

Polybrominated diphenyl ethers (PBDEs) are some of the most popular brominated flame retardants that are applied in many products worldwide [1-7]. BDE-209 has been reported having potential risk to the environment due to its persistence and may cause bioaccumulation in human and animals [8-14]. High concentrations of BDE-209 have been detected in sewage sludge and surface water, which might cause adverse effect on the aquatic organisms [10, 15-19]. Moreover, high levels of BDE-209 also have been detected in humans [3, 6, 8, 20, 21]. PBDEs might affect the thyroid endocrine systems due to their similar structures to the thyroid hormones [22-25]. Previous studies have been reported that BDE-209 can impair the thyroid endocrine activities in rodents [8, 26-28].

Hypothalamic-pituitary-thyroid (HPT) axis regulates the thyroid endocrine system in fish, and HPT axis controls the thyroid hormone dynamics through regulating their synthesis, secretion, transport and metabolism [29-33]. The potential effects of BDE-209 on thyroid endocrine disruption in fish have largely undefined.

In this study, we aimed to investigate the effects of BDE-209 exposure on the HPT axis in zebrafish and determine its effects on thyroid endocrine disruption.

Zebrafish embryos were exposed to different concentrations of BDE-209 for 10 days, gene expression in the HPT axis were determined. Zebrafish larvae can efficiently absorbed and bioaccumulated BDE-209, which led to developmental toxicity and thyroid endocrine impairment. Taken together, these results demonstrated that genes involved in HPT axis could be used for assessing the thyroid disruption effects of BDE-209 exposure in zebrafish.

Materials and methods

## **Chemicals**

BDE-209 and DMSO were purchased from Sigma Aldrich. The BDE-209 stock solution (10 g/L) was prepared in DMSO as stored at - 20 °C.

## **Zebrafish husbandry and BDE-209 treatment**

Wild type zebrafish were maintained as previously described [34]. Embryos were treated with different concentration of BDE-209 solution (0, 0.01, 0.1 and 1 mg/L) from 1 to 10 dpf. Control group received 0.01% (v/v) DMSO. The BDE-209 solution was changed daily. Zebrafish were cultured at  $28 \pm 0.5$  °C in a 14 h light/10 h dark cycle. After exposure, the zebrafish were collected for subsequent gene and protein analysis.

## **Quantitative real-time polymerase chain reaction (qPCR)**

Total RNA extraction and first strand cDNA synthesis were performed as described previously [35]. In brief, 50 zebrafish larvae per group were collected and homogenized for total RNA extraction by using RNeasy Mini Kit (Qiagen) and cDNA was synthesized using ProtoScript First Strand cDNA Synthesis Kit (NEB) follow manufacture's instructions.

Quantitative PCR was performed using the SYBR Green Master Mix (Bio-Rad) and analyzed on a CFX96 Touch Real-Time PCR Detection System (Bio-Rad) [36]. The primer sequences were described somewhere else. The PCR conditions were: 95 °C, 5 min; 40 cycles of 95 °C for 30 s, 55 °C for 30 s, and 72 °C for 30 s.

## **Thyroid hormone measurement**

The extraction and measurement of thyroid hormone were carried out as previously described [37]. In brief, 100 zebrafish larvae of each group were collected and homogenized. After sonication, the samples were centrifuged at  $6000 \times g$  at 4 °C for 20 min, the supernatants were collected and used for thyroid hormone measurement.

## **Statistical analysis**

All data were shown as means  $\pm$  SEM. The differences between the control and PDE-209 treated group were evaluated by one-way ANOVA followed by Tukey's test by using SPSS 18.00.  $p < 0.05$  was considered statistically significant.

## **Results**

### **Toxicity of BDE-209 exposure to zebrafish development**

Exposure to BDE-209 for 10 days has no obviously effect on the hatching and malformation rates in zebrafish. However, we observed the survival rates were significantly decreased in the BDE-209 treated group compared to the controls (Fig. 1).

### **Gene transcription profile**

We next examined the mRNA expression levels of genes regulate thyroid hormones transport, binding and metabolism. As shown in Fig. 2, the mRNA expression levels of CRH and TSH $\beta$  were significantly increased in a dose-dependent manner when treated with 0.01, 0.1 and 1 mg/L BDE-209. The transcriptional expression of genes involved in thyroid development was also significantly increased, such as pax8 and nkx2.1.

### **Thyroid hormones levels**

The total thyroid hormones levels in zebrafish exposed to BDE-209 were examined after 10 days treatment. The T4 levels were reduced in the BDE-209 treated group (Fig. 3). However, the T3 levels in the treated groups were significant increased compared to the control group (Fig. 4).

## **Discussion**

In this study, we evaluated the effect of BDE-209 on the thyroid endocrine disruption using zebrafish larvae. We found that BDE-209 could be bioconcentrated and metabolized in zebrafish larvae. And exposed to BDE-209 could affect the levels of T4 and T3 in zebrafish. These data suggested that we could use HPT axis to assess the effect of PBDE congeners on the thyroid endocrine impairment in zebrafish.

T4 levels were significantly reduced in BDE-209 treated embryos which confirmed the previous studies that BDE-209 impairs the thyroid in rodents and reduced the T4 levels [8, 38-40], however, T3 levels were increased in the BDE-209 treated embryos. These results suggested that PBDEs caused thyroid endocrine impairment by decreasing T4 contents, however, the levels of T3 might alter due to the treated time, species and doses of chemicals. These results indicated that the dose-dependent increases in the T3/T4 ratio was caused by the BDE-209 treatment that could interrupt the thyroid function.

The mRNA expression of CRH and TSH $\beta$  genes were significantly increased in the BDE-209 exposed groups, suggesting that the decreased T4 contents might form a negative feedback mechanism to regulate the relative gene expression [41]. The transcriptional expression of nkx2.1 and pax8 that were involved in thyroid development, were significantly increased in the PDE-209 exposed embryos.

In summary, we found that BDE-209 treatment can impair the thyroid hormones levels and the expression of genes involved in the HPT axis. Our results suggested that the HPT axis could be used for assessing the thyroid endocrine impairment of BDE-209.

## References

1. Alaei, M., et al., *An overview of commercially used brominated flame retardants, their applications, their use patterns in different countries/regions and possible modes of release*. Environment international, 2003. **29**(6): p. 683-689.
2. Rahman, F., et al., *Polybrominated diphenyl ether (PBDE) flame retardants*. Science of the Total Environment, 2001. **275**(1): p. 1-17.
3. Birnbaum, L.S. and D.F. Staskal, *Brominated flame retardants: cause for concern?* Environmental health perspectives, 2004. **112**(1): p. 9.

4. Sjödin, A., et al., *Flame retardant exposure: polybrominated diphenyl ethers in blood from Swedish workers*. Environmental Health Perspectives, 1999. **107**(8): p. 643.
5. La Guardia, M.J., R.C. Hale, and E. Harvey, *Detailed polybrominated diphenyl ether (PBDE) congener composition of the widely used penta-, octa-, and deca-PBDE technical flame-retardant mixtures*. Environmental science & technology, 2006. **40**(20): p. 6247-6254.
6. Sjödin, A., D.G. Patterson, and Å. Bergman, *A review on human exposure to brominated flame retardants—particularly polybrominated diphenyl ethers*. Environment international, 2003. **29**(6): p. 829-839.
7. Song, G., et al., *Effective gene trapping mediated by Sleeping Beauty transposon*. PloS one, 2012. **7**(8): p. e44123.
8. Costa, L.G., et al., *Polybrominated diphenyl ether (PBDE) flame retardants: environmental contamination, human body burden and potential adverse health effects*. Acta Bio Medica Atenei Parmensis, 2009. **79**(3): p. 172-183.
9. Birnbaum, L.S. and E.A.C. Hubal, *Polybrominated diphenyl ethers: a case study for using biomonitoring data to address risk assessment questions*. Environmental Health Perspectives, 2006. **114**(11): p. 1770.
10. Vonderheide, A.P., et al., *Polybrominated diphenyl ethers: causes for concern and knowledge gaps regarding environmental distribution, fate and toxicity*. Science of the Total Environment, 2008. **400**(1): p. 425-436.



11. Van den Steen, E., et al., *Accumulation, tissue-specific distribution and debromination of decabromodiphenyl ether (BDE 209) in European starlings (Sturnus vulgaris)*. Environmental Pollution, 2007. **148**(2): p. 648-653.
12. Bocio, A., et al., *Polybrominated diphenyl ethers (PBDEs) in foodstuffs: human exposure through the diet*. Journal of agricultural and food chemistry, 2003. **51**(10): p. 3191-3195.
13. Stapleton, H.M., et al., *In vivo and in vitro debromination of decabromodiphenyl ether (BDE 209) by juvenile rainbow trout and common carp*. Environmental science & technology, 2006. **40**(15): p. 4653-4658.
14. Wu, N., et al., *Human exposure to PBDEs: associations of PBDE body burdens with food consumption and house dust concentrations*. Environmental science & technology, 2007. **41**(5): p. 1584-1589.
15. Hale, R.C., et al., *Potential role of fire retardant-treated polyurethane foam as a source of brominated diphenyl ethers to the US environment*. Chemosphere, 2002. **46**(5): p. 729-735.
16. Petrovic, M., et al., *Endocrine disrupting compounds and other emerging contaminants in the environment: a survey on new monitoring strategies and occurrence data*. Analytical and Bioanalytical Chemistry, 2004. **378**(3): p. 549-562.
17. Söderström, G., et al., *Photolytic debromination of decabromodiphenyl ether (BDE 209)*. Environmental science & technology, 2004. **38**(1): p. 127-132.
18. Heidler, J., A. Sapkota, and R.U. Halden, *Partitioning, persistence, and accumulation in digested sludge of the topical antiseptic triclocarban during*

- wastewater treatment*. Environmental science & technology, 2006. **40**(11): p. 3634-3639.
19. Gu, Q., et al., *Generation and characterization of a transgenic zebrafish expressing the reverse tetracycline transactivator*. Journal of genetics and genomics, 2013. **40**(10): p. 523-531.
  20. Frederiksen, M., et al., *Human internal and external exposure to PBDEs—a review of levels and sources*. International journal of hygiene and environmental health, 2009. **212**(2): p. 109-134.
  21. Thuresson, K., et al., *Apparent half-lives of hepta- to decabrominated diphenyl ethers in human serum as determined in occupationally exposed workers*. Environmental health perspectives, 2006. **114**(2): p. 176.
  22. Hallgren, S. and P.O. Darnerud, *Polybrominated diphenyl ethers (PBDEs), polychlorinated biphenyls (PCBs) and chlorinated paraffins (CPs) in rats—testing interactions and mechanisms for thyroid hormone effects*. Toxicology, 2002. **177**(2): p. 227-243.
  23. Boas, M., U. Feldt-Rasmussen, and K.M. Main, *Thyroid effects of endocrine disrupting chemicals*. Molecular and cellular endocrinology, 2012. **355**(2): p. 240-248.
  24. Legler, J. and A. Brouwer, *Are brominated flame retardants endocrine disruptors?* Environment international, 2003. **29**(6): p. 879-885.
  25. Zhong, L., et al., *Investigation of effect of 17 $\alpha$ -ethinylestradiol on vigilin expression using an isolated recombinant antibody*. Aquatic toxicology, 2014. **156**: p. 1-9.

26. Tseng, L.-H., et al., *Developmental exposure to decabromodiphenyl ether (PBDE 209): effects on thyroid hormone and hepatic enzyme activity in male mouse offspring*. Chemosphere, 2008. **70**(4): p. 640-647.
27. Schecter, A., et al., *Polybrominated diphenyl ether flame retardants in the US population: current levels, temporal trends, and comparison with dioxins, dibenzofurans, and polychlorinated biphenyls*. Journal of occupational and environmental medicine, 2005. **47**(3): p. 199-211.
28. Cantón, R.F., et al., *In vitro effects of brominated flame retardants and metabolites on CYP17 catalytic activity: a novel mechanism of action?* Toxicology and applied pharmacology, 2006. **216**(2): p. 274-281.
29. Zoeller, R.T., S.W. Tan, and R.W. Tyl, *General background on the hypothalamic-pituitary-thyroid (HPT) axis*. Critical reviews in toxicology, 2007. **37**(1-2): p. 11-53.
30. Fort, D.J., et al., *The hypothalamic-pituitary-thyroid (HPT) axis in frogs and its role in frog development and reproduction*. Critical reviews in toxicology, 2007. **37**(1-2): p. 117-161.
31. Choksi, N.Y., et al., *Role of thyroid hormones in human and laboratory animal reproductive health*. Birth Defects Research Part B: Developmental and Reproductive Toxicology, 2003. **68**(6): p. 479-491.
32. Mastorakos, G., et al., *The menace of endocrine disruptors on thyroid hormone physiology and their impact on intrauterine development*. Endocrine, 2007. **31**(3): p. 219-237.

33. Peter, M.S., *The role of thyroid hormones in stress response of fish*. General and Comparative Endocrinology, 2011. **172**(2): p. 198-210.
34. Zhai, G., et al., *Sept6 is required for ciliogenesis in Kupffer's vesicle, the pronephros, and the neural tube during early embryonic development*. Molecular and cellular biology, 2014. **34**(7): p. 1310-1321.
35. Yang, X., et al., *Nucleoporin 62-like protein activates canonical Wnt signaling through facilitating the nuclear import of  $\beta$ -catenin in zebrafish*. Molecular and cellular biology, 2015. **35**(7): p. 1110-1124.
36. Gu, Q., et al., *Genetic ablation of solute carrier family 7a3a leads to hepatic steatosis in zebrafish during fasting*. Hepatology, 2014. **60**(6): p. 1929-1941.
37. Sap, J., et al., *The c-erb-A protein is a high-affinity receptor for thyroid hormone*. Nature, 1986. **324**: p. 18.
38. Noyes, P.D., D.E. Hinton, and H.M. Stapleton, *Accumulation and debromination of decabromodiphenyl ether (BDE-209) in juvenile fathead minnows (*Pimephales promelas*) induces thyroid disruption and liver alterations*. Toxicological Sciences, 2011. **122**(2): p. 265-274.
39. Noyes, P.D., et al., *Low level exposure to the flame retardant BDE-209 reduces thyroid hormone levels and disrupts thyroid signaling in fathead minnows*. Environmental science & technology, 2013. **47**(17): p. 10012-10021.
40. Forrest, D. and B. Vennström, *Functions of thyroid hormone receptors in mice*. Thyroid, 2000. **10**(1): p. 41-52.
41. Meng, S., et al., *Transdifferentiation Requires iNOS Activation Novelty and Significance*. Circulation Research, 2016. **119**(9): p. e129-e138.

## Figure legends

Figure 1. Developmental toxicity to zebrafish exposed to BDE-209.

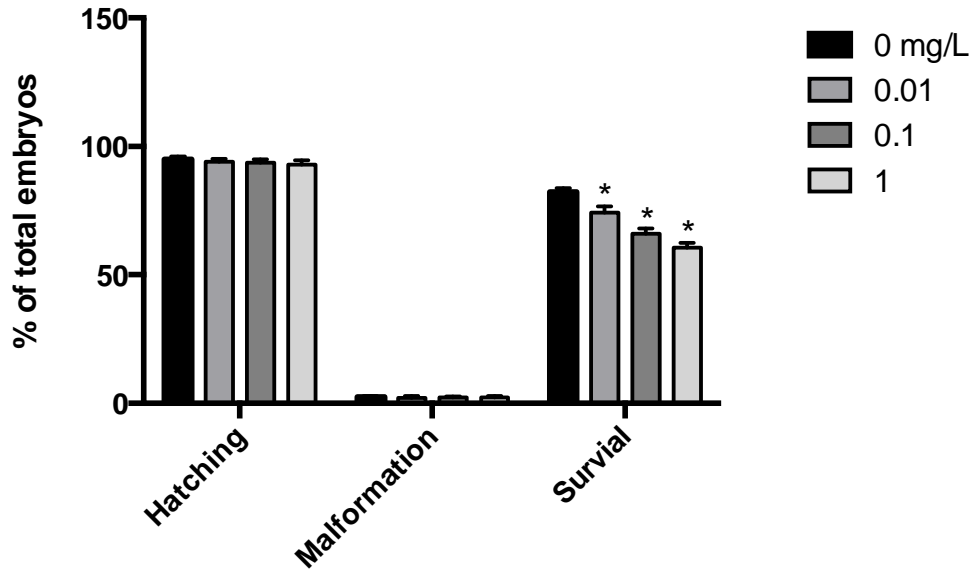

Figure 2. Gene expression in the HPT axis in zebrafish exposed to BDE-209.

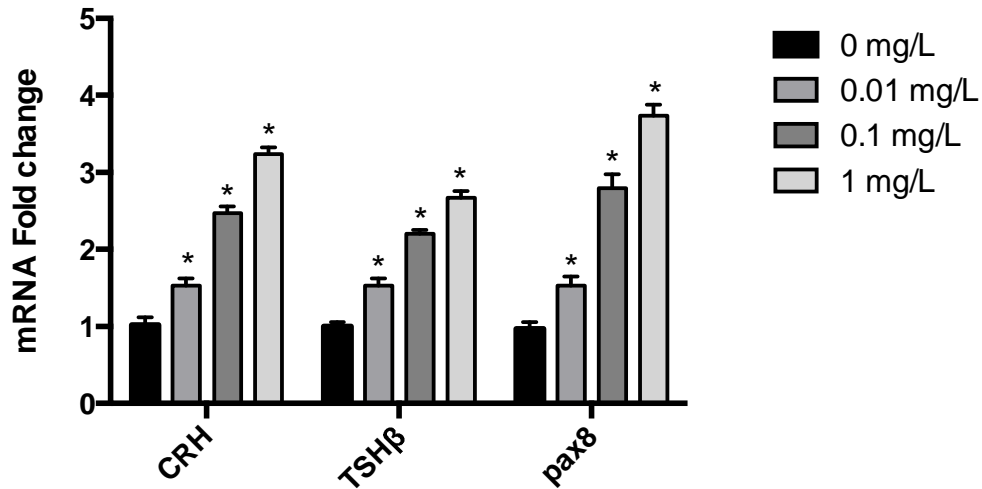

Figure 3. T4 levels in zebrafish exposed to BDE-209.

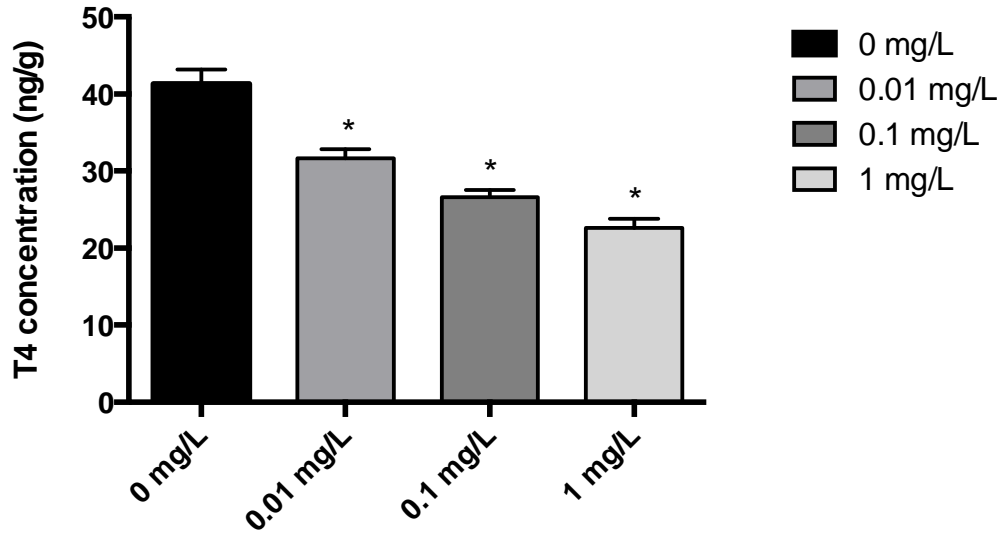

Figure 4. T3 levels in zebrafish exposed to BDE-209.

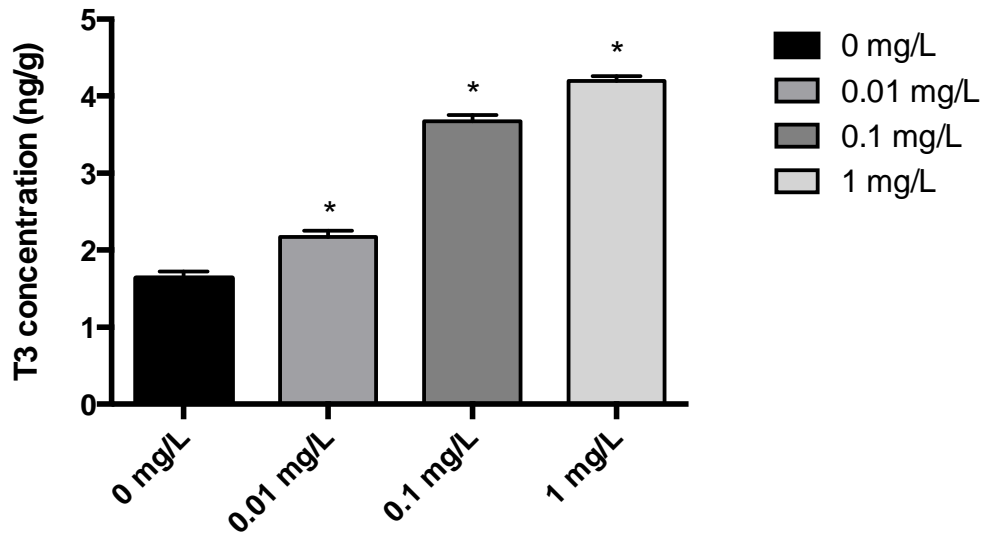

Source: http://www.biorxiv.org/content/10.1101/176917v1.full.pdf
